# Supplementary material for: The Environmental Impact of E-Waste Microplastics: A Systematic Review and Analysis Based on the Driver–Pressure–State–Impact–Response (DPSIR) Framework
Source: MDPI journal article supplement (doi:10.3390/environments11020030), 2024-02-03
Supplement: s1 [file s1]

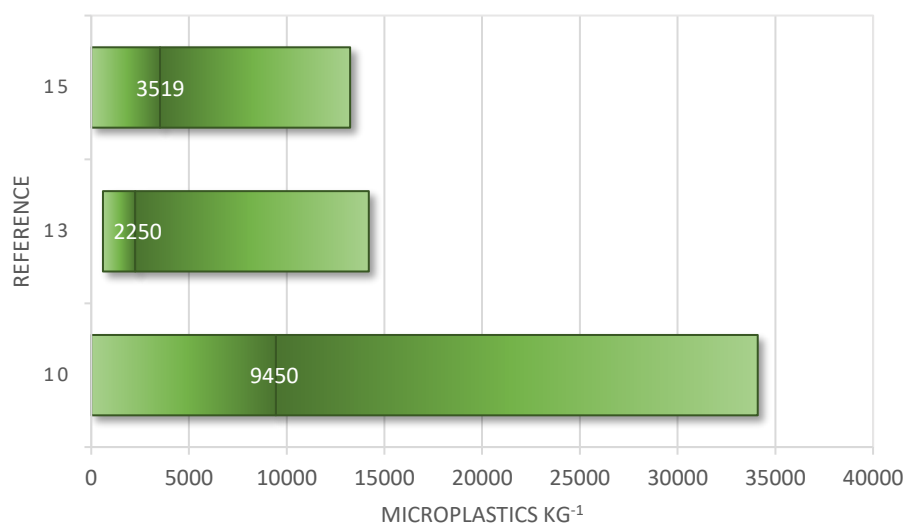

**Figure S-1.** Concentration of e-waste plastics in soil (minimum, mean, and maximum) from an e-waste disassembly site in Guiyu, China [1], an e-waste recycling site in Longtang County, China [2], and a e-waste dumping site in India [3].

**Table S-1.** Concentration (ppm) of metals in plastics (min - max).

|                                       | <i>n</i> | Ag          | As         | Ba           | Br            | Cd         | Cl          | Co   | Cu          | Cr           | Fe            | Hg          | Ti            | Zn           | Pb             | Sb            | Sn         | Sr        | Reference |
|---------------------------------------|----------|-------------|------------|--------------|---------------|------------|-------------|------|-------------|--------------|---------------|-------------|---------------|--------------|----------------|---------------|------------|-----------|-----------|
| EEE plastic                           | 133      | n.a.        | n.a.       | n.a.         | 1.8 - 133,000 | 18.8 - 287 | n.a.        | n.a. | n.a.        | 16.4 - 478   | n.a.          | n.a.        | n.a.          | n.a.         | 2.2 - 11,800   | 38.8 - 56,900 | n.a.       | n.a.      | [4]       |
| EEE plastic                           | 8        | 10.9 - 44.2 | 14.1 - 103 | 417 - 65,500 | 10.6 - 373    | n.a.       | 245,000     | n.a. | 47.0 - 686  | n.a.         | 43 - 841      | n.a.        | 485 - 26,100  | 20.4 - 3,380 | 15.9 - 18.0    | 63 - 260      | 37.9 - 228 | 4.6 - 620 | [5]       |
| Microplastics, Guiyu, China*          | 3        | n.a.        | 3.06       | 308.78       | n.a.          | 0.67       | n.a.        | 1.26 | 4.11        | 11.82        | n.a.          | n.a.        | n.a.          | n.a.         | 20.94          | n.a.          | 3.06       | n.a.      | [1]       |
| Beached plastics, England             | 26       | n.a.        | N.a.       | n.a.         | 29.9 - 516    | n.a.       | n.a.        | n.a. | n.a.        | 22.0         | n.a.          | 8.6         | n.a.          | n.a.         | 58.7 - 116,000 | 189 - 29,800  | N.a.       | n.a.      | [6]       |
| New bio-beads, English Channel        | 10       | n.a.        | n.a.       | 300 - 606    | n.a.          | n.a.       | 786 - 2,340 | n.a. | 20.2 - 22.2 | n.a.         | 122 - 201     | n.a.        | 6850 - 12,276 | 420 - 588    | n.a.           | n.a.          | n.a.       | n.a.      | [7]       |
| Wastewater bio-beads, English Channel | 17       | n.a.        | n.a.       | 318 - 5,500  | 7.8 - 739     | n.a.       | 215 - 1,210 | n.a. | 14.3 - 83.5 | 24.9 - 62.4  | 116 - 3,670   | n.a.        | 809 - 5,240   | 58.6 - 854   | 9.4 - 69.9     | 58.9 - 420    | n.a.       | n.a.      | [7]       |
| Beached bio-beads, English Channel    | 280      | n.a.        | n.a.       | 342 - 8,020  | 5.40 - 6,730  | 35.1 - 312 | 180 - 8,140 | n.a. | 13.5 - 363  | 17.4 - 1,400 | 50.4 - 10,900 | 12.0 - 26.1 | 59.0 - 35,100 | 16.3 - 1,590 | 8.1 - 5,380    | 77.8 - 4,730  | n.a.       | n.a.      | [7]       |

EEE: electrical and electronic equipment; n.a.: not available; \*: mean.

**References:**

1. Chai, B.; Wei, Q.; She, Y.; Lu, G.; Dang, Z.; Yin, H. Soil microplastic pollution in an e-waste dismantling zone of China. *Waste Manag.* **2020**, *118*, 291–301.
2. Zhang, J.; Wu, X.; Guo, H.; Zheng, X.; Mai, B. Pollution of plastic debris and halogenated flame retardants (HFRs) in soil from an abandoned e-waste recycling site: Do plastics contribute to (HFRs) in soil? *J. Hazard. Mater.* **2021**, *410*, 124649.
3. Tun, T.Z.; Kunisue, T.; Tanabe, S.; Prudente, M.; Subramanian, A.; Sudaryanto, A.; Viet, P.H.; Nakata, H. Microplastics in dumping site soils from six Asian countries as a source of plastic additives. *Sci. Total Environ.* **2022**, *806*, 150912.
4. Turner, A. Black plastics: Linear and circular economies, hazardous additives and marine pollution. *Environ. Int.* **2018**, *117*, 308–318.
5. Shi, P.; Wan, Y.; Grandjean, A.; Lee, J.-M.; Tay, C.Y. Clarifying the in-situ cytotoxic potential of electronic waste plastics. *Chemosphere* **2021**, *269*, 128719.
6. Shaw, E.J.; Turner, A. Recycled electronic plastic and marine litter. *Sci. Total Environ.* **2019**, *694*, 133644.
7. Turner, A.; Wallerstein, C.; Arnold, R. Identification, origin and characteristics of bio-bead microplastics from beaches in western Europe. *Sci. Total Environ.* **2019**, *664*, 938–947.
